# Supplementary material for: Isolation and Characterization of Salmonella Jumbo-Phage pSal-SNUABM-04
Source: MDPI journal article supplement (doi:10.3390/v13010027), 2020-12-25
Supplement: s1 [file s1]

**Supplementary Table S1.** Functional categories and homologies of the predicted open reading frames (ORFs) in pSal-SNUABM-04.

| Functional group                                  | Locus tag         | Encoded protein <sup>1</sup><br>[Conserved domain <sup>2</sup> ]                                                                                                                                                                                               | Best-matched Organism            | BLASTn Identity |
|---------------------------------------------------|-------------------|----------------------------------------------------------------------------------------------------------------------------------------------------------------------------------------------------------------------------------------------------------------|----------------------------------|-----------------|
| Bacterial gene                                    | pSAL_SNUABM04_001 | hypothetical protein<br>[protease_HsIV (cd01913); CDD_v3.18, Proteasome (PF00227.27); Pfam-A_v33.1]                                                                                                                                                            | [Erwinia phage vB_EamM_Parshik]  | 98.09%          |
|                                                   | pSAL_SNUABM04_002 | hypothetical protein                                                                                                                                                                                                                                           | [Erwinia phage vB_EamM_Huxley]   | 85.71%          |
|                                                   | pSAL_SNUABM04_003 | hypothetical protein                                                                                                                                                                                                                                           | [Erwinia phage vB_EamM_Stratton] | 65.04%          |
|                                                   | pSAL_SNUABM04_004 | hypothetical protein                                                                                                                                                                                                                                           | [Erwinia phage vB_EamM_Parshik]  | 86.30%          |
|                                                   | pSAL_SNUABM04_005 | tellurite resistance TerB family protein<br>[TerB (cd07176); CDD_v3.18, TerB (PF050099); Pfam-A_v33.1]                                                                                                                                                         | [Pantoea sp. AV62]               | 77.62%          |
|                                                   | pSAL_SNUABM04_006 | hypothetical protein<br>[DUF3927 domain containing protein (PF13064.7); Pfam-A_v33.1]                                                                                                                                                                          | [Erwinia phage vB_EamM_Huxley]   | 96.67%          |
|                                                   | pSAL_SNUABM04_007 | hypothetical protein<br>[PBP2_TtGluBP (cd13567); CDD_v3.18, NMT1 like family (PF16868.6); Pfam-A_v33.1]                                                                                                                                                        | [Erwinia phage vB_EamM_Huxley]   | 99.62%          |
|                                                   | pSAL_SNUABM04_008 | hypothetical protein                                                                                                                                                                                                                                           | [Erwinia phage vB_EamM_Huxley]   | 93.75%          |
| DNA replication and nucleotide metabolism protein | pSAL_SNUABM04_009 | putative chromosome partitioning protein ParB<br>[Thermus thermophilus stage 0 sporulation protein J-like N-terminal domain, ParB family member (cd16393) containing protein; CDD_v3.18, ParB-like nuclease domain (PF02195) containing protein; Pfam-A_v33.1] | [Erwinia phage vB_EamM_Parshik]  | 98.15%          |
|                                                   | pSAL_SNUABM04_010 | hypothetical protein                                                                                                                                                                                                                                           | [Erwinia phage vB_EamM_Huxley]   | 96.67%          |
|                                                   | pSAL_SNUABM04_011 | hypothetical protein                                                                                                                                                                                                                                           | [Erwinia phage vB_EamM_Parshik]  | 96.93%          |
|                                                   | pSAL_SNUABM04_012 | hypothetical protein                                                                                                                                                                                                                                           | [Erwinia phage vB_EamM_Huxley]   | 93.84%          |
|                                                   | pSAL_SNUABM04_013 | hypothetical protein                                                                                                                                                                                                                                           | [Erwinia phage vB_EamM_Huxley]   | 100.00%         |
|                                                   | pSAL_SNUABM04_014 | hypothetical protein                                                                                                                                                                                                                                           | [Erwinia phage vB_EamM_Parshik]  | 99.63%          |

|                                                      |                   |                                                                                                                                                                                                                                      |                                    |         |
|------------------------------------------------------|-------------------|--------------------------------------------------------------------------------------------------------------------------------------------------------------------------------------------------------------------------------------|------------------------------------|---------|
| DNA replication and<br>nucleotide metabolism protein | pSAL_SNUABM04_015 | hypothetical protein                                                                                                                                                                                                                 | [Erwinia phage<br>vB_EamM_Huxley]  | 96.67%  |
|                                                      | pSAL_SNUABM04_016 | hypothetical protein                                                                                                                                                                                                                 | [Erwinia phage<br>Machina]         | 98.16%  |
|                                                      | pSAL_SNUABM04_017 | hypothetical protein                                                                                                                                                                                                                 | [Erwinia phage<br>vB_EamM_Parshik] | 98.98%  |
|                                                      | pSAL_SNUABM04_018 | hypothetical protein                                                                                                                                                                                                                 | [Erwinia phage<br>vB_EamM_Huxley]  | 100.00% |
|                                                      | pSAL_SNUABM04_019 | hypothetical protein                                                                                                                                                                                                                 | [Erwinia phage<br>vB_EamM_Huxley]  | 97.62%  |
|                                                      | pSAL_SNUABM04_020 | hypothetical protein                                                                                                                                                                                                                 | [Erwinia phage<br>vB_EamM_Huxley]  | 97.89%  |
|                                                      | pSAL_SNUABM04_021 | hypothetical protein                                                                                                                                                                                                                 | [Erwinia phage<br>vB_EamM_Huxley]  | 97.22%  |
|                                                      | pSAL_SNUABM04_022 | hypothetical protein                                                                                                                                                                                                                 | [Erwinia phage<br>vB_EamM_Parshik] | 96.46%  |
|                                                      | pSAL_SNUABM04_023 | hypothetical protein                                                                                                                                                                                                                 | [Erwinia phage<br>vB_EamM_Huxley]  | 100.00% |
|                                                      | pSAL_SNUABM04_024 | hypothetical protein<br>[POLBc_alpha; DNA polymerase type-B alpha<br>subfamily catalytic domain (cd05532) containing<br>protein; CDD_v3.18, DNA_pol_B; DNA polymerase<br>family B (PF00136.22) containing protein; Pfam-<br>A_v33.1] | [Erwinia phage<br>vB_EamM_Parshik] | 99.60%  |
|                                                      | pSAL_SNUABM04_025 | hypothetical protein                                                                                                                                                                                                                 | [Erwinia phage<br>vB_EamM_Parshik] | 89.91%  |
|                                                      | pSAL_SNUABM04_026 | hypothetical protein                                                                                                                                                                                                                 | [Erwinia phage<br>vB_EamM_Huxley]  | 98.28%  |
|                                                      | pSAL_SNUABM04_027 | hypothetical protein                                                                                                                                                                                                                 | [Erwinia phage<br>vB_EamM_Huxley]  | 95.88%  |
|                                                      | pSAL_SNUABM04_028 | hypothetical protein                                                                                                                                                                                                                 | [Erwinia phage<br>vB_EamM_Huxley]  | 99.15%  |
|                                                      | pSAL_SNUABM04_029 | hypothetical protein                                                                                                                                                                                                                 | [Erwinia phage<br>vB_EamM_Huxley]  | 98.01%  |
|                                                      | pSAL_SNUABM04_030 | putative DNA-directed RNA polymerase beta subunit<br>[largest subunit (beta') of bacterial DNA-dependent<br>RNA polymerase N-terminal domain (cd01609);<br>CDD_v3.18]                                                                | [Erwinia phage<br>vB_EamM_Huxley]  | 100.00% |
|                                                      | pSAL_SNUABM04_031 | hypothetical protein                                                                                                                                                                                                                 | [Erwinia phage<br>vB_EamM_Huxley]  | 100.00% |

|                                                   |                   |                                                                                                                                                                                                                                                    |                                 |         |
|---------------------------------------------------|-------------------|----------------------------------------------------------------------------------------------------------------------------------------------------------------------------------------------------------------------------------------------------|---------------------------------|---------|
| DNA replication and nucleotide metabolism protein | pSAL_SNUABM04_032 | hypothetical protein                                                                                                                                                                                                                               | [Erwinia phage vB_EamM_Huxley]  | 100.00% |
|                                                   | pSAL_SNUABM04_033 | hypothetical protein                                                                                                                                                                                                                               | [Erwinia phage vB_EamM_Huxley]  | 99.52%  |
|                                                   | pSAL_SNUABM04_034 | putative nuclease SbcCD D subunit [MPP_Mre11_N; Mre11 nuclease, N-terminal metallophosphatase domain (cd00840) containing protein; CDD_v3.18]                                                                                                      | [Erwinia phage vB_EamM_Huxley]  | 99.23%  |
|                                                   | pSAL_SNUABM04_035 | hypothetical protein                                                                                                                                                                                                                               | [Erwinia phage vB_EamM_Huxley]  | 99.29%  |
|                                                   | pSAL_SNUABM04_036 | hypothetical protein                                                                                                                                                                                                                               | [Erwinia phage vB_EamM_Huxley]  | 98.62%  |
|                                                   | pSAL_SNUABM04_037 | hypothetical protein                                                                                                                                                                                                                               | [Erwinia phage vB_EamM_Huxley]  | 99.26%  |
|                                                   | pSAL_SNUABM04_038 | hypothetical protein                                                                                                                                                                                                                               | [Erwinia phage vB_EamM_Huxley]  | 98.23%  |
|                                                   | pSAL_SNUABM04_039 | hypothetical protein                                                                                                                                                                                                                               | [Erwinia phage vB_EamM_Huxley]  | 99.78%  |
| DNA replication and nucleotide metabolism protein | pSAL_SNUABM04_040 | hypothetical protein                                                                                                                                                                                                                               | [Erwinia phage vB_EamM_Huxley]  | 100.00% |
|                                                   | pSAL_SNUABM04_041 | putative DNA-directed RNA polymerase beta subunit [RNA polymerase beta subunit (cd00653); CDD_v3.18, RNA polymerase Rpb2_6 (PF00562.29), and RNA polymerase Rpb2_7 (PF04560.21) domain containing protein; Pfam-A_v33.1]                           | [Erwinia phage vB_EamM_Huxley]  | 99.86%  |
| DNA replication and nucleotide metabolism protein | pSAL_SNUABM04_042 | putative DNA-directed RNA polymerase beta subunit [RNAP_beta'_N (cd01609), RNAP_beta'_C (cd02655) containing protein; CDD_v3.18, RNA polymerase Rpb1, domain 3 (PF04983), domain 4 (PF05000), domain 5 (PF04998) containing protein; Pfam-A_v33.1] | [Erwinia phage vB_EamM_Huxley]  | 99.57%  |
| DNA replication and nucleotide metabolism protein | pSAL_SNUABM04_043 | putative ATP-dependent DNA helicase [Cas system-associated protein Cas3 type I (cd09639) containing protein; CDD_v3.18]                                                                                                                            | [Erwinia phage vB_EamM_Parshik] | 99.47%  |
|                                                   | pSAL_SNUABM04_044 | hypothetical protein                                                                                                                                                                                                                               | [Erwinia phage vB_EamM_Huxley]  | 98.85%  |
|                                                   | pSAL_SNUABM04_045 | hypothetical protein                                                                                                                                                                                                                               | [Erwinia phage vB_EamM_Huxley]  | 96.53%  |
|                                                   | pSAL_SNUABM04_046 | hypothetical protein                                                                                                                                                                                                                               | [Erwinia phage Machina]         | 98.52%  |

|                                                   |                   |                                                                                                                                                                                                                                                    |                                 |         |
|---------------------------------------------------|-------------------|----------------------------------------------------------------------------------------------------------------------------------------------------------------------------------------------------------------------------------------------------|---------------------------------|---------|
|                                                   | pSAL_SNUABM04_047 | hypothetical protein                                                                                                                                                                                                                               | [Erwinia phage vB_EamM_Huxley]  | 100.00% |
|                                                   | pSAL_SNUABM04_048 | hypothetical protein                                                                                                                                                                                                                               | [Erwinia phage vB_EamM_Huxley]  | 99.30%  |
| DNA replication and nucleotide metabolism protein | pSAL_SNUABM04_049 | putative DNA-directed RNA polymerase beta subunit [RNAP_largest_subunit_N (cd00399), RNAP_largest_subunit_C (cd00630) containing protein; CDD_v3.18, RNA polymerase Rpb1_domain 3 (PF04983), domain 4 (PF05000), domain 5 (PF04998); Pfam-A_v33.1] | [Erwinia phage vB_EamM_Parshik] | 99.77%  |
|                                                   | pSAL_SNUABM04_050 | hypothetical protein                                                                                                                                                                                                                               | [Erwinia phage vB_EamM_Huxley]  | 95.86%  |
| DNA replication and nucleotide metabolism protein | pSAL_SNUABM04_051 | putative B family DNA polymerase [DNA_polB_II_exonuclease domain (cd05784), catalytic domain_Pol_II (cd05537) containing protein; CDD_v3.18]                                                                                                       | [Erwinia phage vB_EamM_Huxley]  | 99.49%  |
| structural and packaging protein                  | pSAL_SNUABM04_052 | putative virion structural protein [M48 subfamily A-like (cd07345) containing protein; CDD_v3.18, Peptidase family M48 (PF01435) containing protein; Pfam-A_v33.1]                                                                                 | [Erwinia phage vB_EamM_Huxley]  | 98.45%  |
|                                                   | pSAL_SNUABM04_053 | hypothetical protein                                                                                                                                                                                                                               | [Erwinia phage vB_EamM_Huxley]  | 100.00% |
|                                                   | pSAL_SNUABM04_054 | hypothetical protein                                                                                                                                                                                                                               | [Erwinia phage vB_EamM_Huxley]  | 98.63%  |
| structural and packaging protein                  | pSAL_SNUABM04_055 | putative virion structural protein                                                                                                                                                                                                                 | [Erwinia phage Machina]         | 99.49%  |
| structural and packaging protein                  | pSAL_SNUABM04_056 | putative virion structural protein                                                                                                                                                                                                                 | [Erwinia phage vB_EamM_Huxley]  | 100.00% |
| structural and packaging protein                  | pSAL_SNUABM04_057 | putative virion structural protein                                                                                                                                                                                                                 | [Erwinia phage vB_EamM_Huxley]  | 98.55%  |
| structural and packaging protein                  | pSAL_SNUABM04_058 | putative virion structural protein [DUF5667 domain (PF18915.1) containing protein; Pfam-A_v33.1]                                                                                                                                                   | [Erwinia phage vB_EamM_Huxley]  | 99.04%  |
|                                                   | pSAL_SNUABM04_059 | hypothetical protein                                                                                                                                                                                                                               | [Erwinia phage vB_EamM_Huxley]  | 99.46%  |
|                                                   | pSAL_SNUABM04_060 | hypothetical protein phiKZ-like phage internal head protein (PF12699.8); Pfam-A_v33.1                                                                                                                                                              | [Erwinia phage vB_EamM_Huxley]  | 98.60%  |
|                                                   | pSAL_SNUABM04_061 | hypothetical protein phiKZ-like phage internal head protein (PF12699.8); Pfam-A_v33.1                                                                                                                                                              | [Erwinia phage Machina]         | 88.97%  |

|                                                      |                   |                                                                                                                                                                                                                 |                                    |        |
|------------------------------------------------------|-------------------|-----------------------------------------------------------------------------------------------------------------------------------------------------------------------------------------------------------------|------------------------------------|--------|
| DNA replication and<br>nucleotide metabolism protein | pSAL_SNUABM04_062 | hypothetical protein                                                                                                                                                                                            | [Erwinia phage<br>vB_EamM_Huxley]  | 93.81% |
|                                                      | pSAL_SNUABM04_063 | hypothetical protein                                                                                                                                                                                            | [Erwinia phage<br>vB_EamM_Huxley]  | 90.91% |
|                                                      | pSAL_SNUABM04_064 | putative dihydrofolate reductase<br>[Dihydrofolate reductase (cd00209, PF00186.20);<br>CDD_v3.18, Pfam-A_v33.1]                                                                                                 | [Erwinia phage<br>vB_EamM_Huxley]  | 98.33% |
|                                                      | pSAL_SNUABM04_065 | hypothetical protein                                                                                                                                                                                            | [Erwinia phage<br>vB_EamM_Huxley]  | 98.03% |
| structural and packaging<br>protein                  | pSAL_SNUABM04_066 | putative virion structural protein                                                                                                                                                                              | [Erwinia phage<br>Machina]         | 98.83% |
|                                                      | pSAL_SNUABM04_067 | hypothetical protein                                                                                                                                                                                            | [Erwinia phage<br>vB_EamM_Huxley]  | 99.44% |
| structural and packaging<br>protein                  | pSAL_SNUABM04_068 | putative virion structural protein                                                                                                                                                                              | [Erwinia phage<br>vB_EamM_Huxley]  | 99.54% |
|                                                      | pSAL_SNUABM04_069 | hypothetical protein                                                                                                                                                                                            | [Erwinia phage<br>vB_EamM_Huxley]  | 98.11% |
| DNA replication and<br>nucleotide metabolism protein | pSAL_SNUABM04_070 | putative DNA ligase<br>[NAD+ dependent DNA ligase adenylation domain<br>(cd00114) containing protein; CDD_v3.18, NAD-<br>dependent DNA ligase adenylation domain (PF01653)<br>containing protein; Pfam-A_v33.1] | [Salmonella phage<br>SPAsTU]       | 58.06% |
|                                                      | pSAL_SNUABM04_071 | hypothetical protein                                                                                                                                                                                            | [Erwinia phage<br>vB_EamM_Huxley]  | 86.44% |
|                                                      | pSAL_SNUABM04_072 | hypothetical protein                                                                                                                                                                                            | [Erwinia phage<br>vB_EamM_Huxley]  | 93.33% |
|                                                      | pSAL_SNUABM04_073 | hypothetical protein                                                                                                                                                                                            | [Erwinia phage<br>vB_EamM_Caitlin] | 43.90% |
|                                                      | pSAL_SNUABM04_074 | hypothetical protein                                                                                                                                                                                            | [Erwinia phage<br>Machina]         | 97.48% |
|                                                      | pSAL_SNUABM04_075 | hypothetical protein                                                                                                                                                                                            | [Erwinia phage<br>vB_EamM_Huxley]  | 98.46% |
|                                                      | pSAL_SNUABM04_076 | hypothetical protein                                                                                                                                                                                            | [Erwinia phage<br>vB_EamM_Huxley]  | 82.98% |
|                                                      | pSAL_SNUABM04_077 | putative helicase<br>[DnaB-like helicase N terminal doamin (PF00772), C<br>terminal domain (PF03796) containing protein; Pfam-<br>A_v33.1]                                                                      | [Erwinia phage<br>vB_EamM_Huxley]  | 99.42% |
|                                                      | pSAL_SNUABM04_078 | hypothetical protein                                                                                                                                                                                            | [Erwinia phage<br>vB_EamM_Huxley]  | 99.44% |

|                                                   |                   |                                                                                                                                          |                                 |         |
|---------------------------------------------------|-------------------|------------------------------------------------------------------------------------------------------------------------------------------|---------------------------------|---------|
| structural and packaging protein                  | pSAL_SNUABM04_079 | putative major capsid protein                                                                                                            | [Erwinia phage vB_EamM_Huxley]  | 99.73%  |
|                                                   | pSAL_SNUABM04_080 | hypothetical protein                                                                                                                     | [Erwinia phage vB_EamM_Parshik] | 84.40%  |
|                                                   | pSAL_SNUABM04_081 | hypothetical protein [DUF1640 domain (PF07798.12) containing protein; Pfam-A_v33.1]                                                      | [Erwinia phage vB_EamM_Huxley]  | 98.90%  |
|                                                   | pSAL_SNUABM04_082 | hypothetical protein                                                                                                                     | [Erwinia phage vB_EamM_Huxley]  | 99.66%  |
|                                                   | pSAL_SNUABM04_083 | hypothetical protein                                                                                                                     | [Erwinia phage vB_EamM_Parshik] | 98.85%  |
|                                                   | pSAL_SNUABM04_084 | hypothetical protein                                                                                                                     | [Erwinia phage Machina]         | 72.73%  |
|                                                   | pSAL_SNUABM04_085 | hypothetical protein                                                                                                                     | [Erwinia phage vB_EamM_Huxley]  | 98.02%  |
| structural and packaging protein                  | pSAL_SNUABM04_086 | putative virion structural protein [T4-like capsid assembly protein; PF07230.12]                                                         | [Erwinia phage vB_EamM_Huxley]  | 99.15%  |
| structural and packaging protein                  | pSAL_SNUABM04_087 | putative virion structural protein                                                                                                       | [Erwinia phage vB_EamM_Huxley]  | 99.31%  |
|                                                   | pSAL_SNUABM04_088 | hypothetical protein                                                                                                                     | [Erwinia phage vB_EamM_Huxley]  | 100.00% |
| structural and packaging protein                  | pSAL_SNUABM04_089 | putative virion structural protein                                                                                                       | [Erwinia phage vB_EamM_Huxley]  | 98.64%  |
|                                                   | pSAL_SNUABM04_090 | hypothetical protein [RuvC; Crossover junction endodeoxyribonuclease RuvC (cd16962, PF02075.18) domain protein; CDD_v3.18, Pfam-A_v33.1] | [Erwinia phage vB_EamM_Huxley]  | 100.00% |
|                                                   | pSAL_SNUABM04_091 | hypothetical protein                                                                                                                     | [Erwinia phage Machina]         | 98.91%  |
| DNA replication and nucleotide metabolism protein | pSAL_SNUABM04_092 | hypothetical protein                                                                                                                     | [Erwinia phage vB_EamM_Huxley]  | 89.37%  |
|                                                   | pSAL_SNUABM04_093 | putative acetyltransferase [Acetyltransferase (GNAT) domain (PF13673.8) containing protein; Pfam-A_v33.1]                                | [Erwinia phage vB_EamM_Huxley]  | 97.47%  |
|                                                   | pSAL_SNUABM04_094 | hypothetical protein                                                                                                                     | [Erwinia phage vB_EamM_Huxley]  | 96.27%  |
|                                                   | pSAL_SNUABM04_095 | hypothetical protein                                                                                                                     | [Erwinia phage vB_EamM_Huxley]  | 99.23%  |
|                                                   | pSAL_SNUABM04_096 | hypothetical protein [YpsA SLOG family protein (PF06908.12); Pfam-A_v33.1]                                                               | [Erwinia phage vB_EamM_Parshik] | 98.50%  |

|                                                   |                   |                                                                                                                                               |                                                        |         |
|---------------------------------------------------|-------------------|-----------------------------------------------------------------------------------------------------------------------------------------------|--------------------------------------------------------|---------|
| DNA replication and nucleotide metabolism protein | pSAL_SNUABM04_097 | hypothetical protein                                                                                                                          | [Erwinia phage vB_EamM_Huxley]                         | 75.28%  |
|                                                   | pSAL_SNUABM04_098 | hypothetical protein<br>phiKZ-like phage internal head protein (PF12699.8); Pfam-A_v33.1]                                                     | [Erwinia phage vB_EamM_Huxley]                         | 99.74%  |
|                                                   | pSAL_SNUABM04_099 | putative GNAT family acetyltransferase [Acetyltransferase (GNAT) domain (PF13527) protein; Pfam-A_v33.1]                                      | [Erwinia phage vB_EamM_Huxley]                         | 99.37%  |
|                                                   | pSAL_SNUABM04_100 | hypothetical protein                                                                                                                          | [Erwinia phage Machina]                                | 99.00%  |
|                                                   | pSAL_SNUABM04_101 | hypothetical protein                                                                                                                          | [Erwinia phage vB_EamM_Huxley]                         | 99.18%  |
|                                                   | pSAL_SNUABM04_102 | hypothetical protein                                                                                                                          | [Erwinia phage Machina]                                | 99.50%  |
|                                                   | pSAL_SNUABM04_103 | hypothetical protein                                                                                                                          | [Salmonella enterica subsp. enterica serovar Adabraka] | 65.08%  |
| DNA replication and nucleotide metabolism protein | pSAL_SNUABM04_104 | putative thymidylate kinase [Thymidine monophosphate kinase (cd01672) protein; CDD_v3.18, Thymidylate kinase (PF02223) protein; Pfam-A_v33.1] | [Erwinia phage Machina]                                | 99.53%  |
| DNA replication and nucleotide metabolism protein | pSAL_SNUABM04_105 | putative transcriptional regulator [Antirepressor AbbA (PF14156) containing protein; Pfam-A_v33.1]                                            | [Erwinia phage Machina]                                | 98.28%  |
| DNA replication and nucleotide metabolism protein | pSAL_SNUABM04_106 | hypothetical protein                                                                                                                          | [Erwinia phage vB_EamM_Huxley]                         | 97.40%  |
|                                                   | pSAL_SNUABM04_107 | putative GCN5-related N-acetyltransferase [Acetyltransferase (GNAT) domain (PF13420) containing protein; Pfam-A_v33.1]                        | [Erwinia phage vB_EamM_Huxley]                         | 97.91%  |
| DNA replication and nucleotide metabolism protein | pSAL_SNUABM04_108 | putative DNA adenine methylase [D12 class N6 adenine-specific DNA methyltransferase (PF02086.16) protein; Pfam-A_v33.1]                       | [Erwinia phage vB_EamM_Huxley]                         | 98.90%  |
|                                                   | pSAL_SNUABM04_109 | hypothetical protein                                                                                                                          | [Erwinia phage vB_EamM_Huxley]                         | 98.86%  |
|                                                   | pSAL_SNUABM04_110 | hypothetical protein                                                                                                                          | [Erwinia phage vB_EamM_Huxley]                         | 98.42%  |
|                                                   | pSAL_SNUABM04_111 | hypothetical protein                                                                                                                          | [Erwinia phage vB_EamM_Huxley]                         | 100.00% |
|                                                   | pSAL_SNUABM04_112 | hypothetical protein                                                                                                                          | [Erwinia phage vB_EamM_Huxley]                         | 99.40%  |
|                                                   |                   |                                                                                                                                               |                                                        |         |

|                                                                 |                   |                                                                                                                                                     |                                                                |        |
|-----------------------------------------------------------------|-------------------|-----------------------------------------------------------------------------------------------------------------------------------------------------|----------------------------------------------------------------|--------|
| DNA replication and<br>nucleotide metabolism related<br>protein | pSAL_SNUABM04_113 | hypothetical protein                                                                                                                                | [Erwinia phage<br>vB_EamM_Huxley]                              | 95.50% |
|                                                                 | pSAL_SNUABM04_114 | hypothetical protein                                                                                                                                | [Salmonella enterica<br>subsp. enterica serovar<br>Heidelberg] | 76.15% |
|                                                                 | pSAL_SNUABM04_115 | hypothetical protein                                                                                                                                | [Erwinia phage<br>vB_EamM_Huxley]                              | 94.33% |
|                                                                 | pSAL_SNUABM04_116 | hypothetical protein<br>[protease_HslV (cd01913) protein; CDD_v3.18,<br>proteasome (PF00227) protein; Pfam-A_v33.1]                                 | [Erwinia phage<br>vB_EamM_Huxley]                              | 97.71% |
|                                                                 | pSAL_SNUABM04_117 | hypothetical protein                                                                                                                                | [Erwinia phage<br>vB_EamM_Huxley]                              | 95.05% |
|                                                                 | pSAL_SNUABM04_118 | hypothetical protein                                                                                                                                | [Erwinia phage<br>vB_EamM_Parshik]                             | 97.54% |
|                                                                 | pSAL_SNUABM04_119 | hypothetical protein                                                                                                                                | [Erwinia phage<br>Machina]                                     | 98.18% |
|                                                                 | pSAL_SNUABM04_120 | hypothetical protein                                                                                                                                | [Erwinia phage<br>vB_EamM_Huxley]                              | 96.81% |
|                                                                 | pSAL_SNUABM04_121 | putative dnaA protein<br>[DNA replication licensing factor Mcm4 (cd17755)<br>protein; CDD_v3.18, bacterial dnaA (PF00308) protein;<br>Pfam-A_v33.1] | [Erwinia phage<br>vB_EamM_Huxley]                              | 97.22% |
|                                                                 | pSAL_SNUABM04_122 | hypothetical protein                                                                                                                                | Erwinia phage<br>vB_EamM_Parshik                               | 92.31% |
|                                                                 | pSAL_SNUABM04_123 | hypothetical protein                                                                                                                                | [Erwinia phage<br>vB_EamM_Huxley]                              | 91.72% |
|                                                                 | pSAL_SNUABM04_124 | hypothetical protein                                                                                                                                | [Erwinia phage<br>Machina]                                     | 71.21% |
|                                                                 | pSAL_SNUABM04_125 | hypothetical protein                                                                                                                                | [Erwinia phage<br>vB_EamM_Huxley]                              | 96.55% |
|                                                                 | pSAL_SNUABM04_126 | hypothetical protein<br>[ExsB domain (cd01995) containing protein;<br>CDD_v3.18, QueC domain (PF06508) containing<br>protein; Pfam-A_v33.1]         | [Erwinia phage<br>vB_EamM_Parshik]                             | 97.94% |
|                                                                 | pSAL_SNUABM04_127 | hypothetical protein<br>[DUF488 domain (PF04343.14) containing protein;<br>Pfam-A_v33.1]                                                            | [Erwinia phage<br>vB_EamM_Parshik]                             | 98.78% |
|                                                                 | pSAL_SNUABM04_128 | hypothetical protein                                                                                                                                | [Erwinia phage<br>vB_EamM_Huxley]                              | 95.38% |
|                                                                 | pSAL_SNUABM04_129 | hypothetical protein                                                                                                                                | [Erwinia phage<br>vB_EamM_Huxley]                              | 71.67% |



|                                  |                   |                                                                                                                 |                                  |        |
|----------------------------------|-------------------|-----------------------------------------------------------------------------------------------------------------|----------------------------------|--------|
|                                  | pSAL_SNUABM04_130 | hypothetical protein                                                                                            | [Erwinia phage vB_EamM_Huxley]   | 98.84% |
|                                  | pSAL_SNUABM04_131 | hypothetical protein                                                                                            | [Erwinia phage vB_EamM_Huxley]   | 94.51% |
|                                  | pSAL_SNUABM04_132 | hypothetical protein                                                                                            | [Erwinia phage vB_EamM_Huxley]   | 98.15% |
|                                  | pSAL_SNUABM04_133 | hypothetical protein                                                                                            | [Erwinia phage vB_EamM_Huxley]   | 88.49% |
|                                  | pSAL_SNUABM04_134 | hypothetical protein                                                                                            | [Erwinia phage vB_EamM_Huxley]   | 95.68% |
|                                  | pSAL_SNUABM04_135 | hypothetical protein                                                                                            | [Erwinia phage vB_EamM_Huxley]   | 75.17% |
|                                  | pSAL_SNUABM04_136 | hypothetical protein                                                                                            | [Erwinia phage Machina]          | 72.02% |
|                                  | pSAL_SNUABM04_137 | hypothetical protein                                                                                            | [Erwinia phage Machina]          | 75.18% |
|                                  | pSAL_SNUABM04_138 | hypothetical protein                                                                                            | [Erwinia phage vB_EamM_Huxley]   | 91.78% |
| lysis related protein            | pSAL_SNUABM04_139 | putative EPS depolymerase<br>[Pectate lysate superfamily domain (PF12708.8)<br>cotaining protein; Pfam-A_v33.1] | [Erwinia phage vB_EamM_Parshik]  | 96.66% |
| structural and packaging protein | pSAL_SNUABM04_140 | putative virion structural protein                                                                              | [Erwinia phage vB_EamM_Parshik]  | 73.11% |
| structural and packaging protein | pSAL_SNUABM04_141 | putative virion structural protein                                                                              | [Erwinia phage vB_EamM_Stratton] | 74.17% |
| structural and packaging protein | pSAL_SNUABM04_142 | putative virion structural protein                                                                              | [Erwinia phage vB_EamM_Asesino]  | 72.89% |
| structural and packaging protein | pSAL_SNUABM04_143 | putative virion structural protein                                                                              | [Erwinia phage vB_EamM_Asesino]  | 78.95% |
|                                  | pSAL_SNUABM04_144 | hypothetical protein                                                                                            | [Erwinia phage vB_EamM_Asesino]  | 78.49% |
| structural and packaging protein | pSAL_SNUABM04_145 | putative virion structural protein                                                                              | [Erwinia phage vB_EamM_Asesino]  | 71.53% |
| structural and packaging protein | pSAL_SNUABM04_146 | putative virion structural protein                                                                              | [Erwinia phage vB_EamM_Asesino]  | 72.24% |
| structural and packaging protein | pSAL_SNUABM04_147 | putative virion structural protein                                                                              | [Erwinia phage vB_EamM_Asesino]  | 43.42% |
| structural and packaging protein | pSAL_SNUABM04_148 | putative virion structural protein                                                                              | [Erwinia phage vB_EamM_Asesino]  | 51.92% |
| structural and packaging protein | pSAL_SNUABM04_149 | putative virion structural protein                                                                              | [Erwinia phage vB_EamM_Asesino]  | 46.96% |

|                                                   |                   |                                                                                                                                                                                                                         |                                 |         |
|---------------------------------------------------|-------------------|-------------------------------------------------------------------------------------------------------------------------------------------------------------------------------------------------------------------------|---------------------------------|---------|
| structural and packaging protein                  | pSAL_SNUABM04_150 | putative virion structural protein                                                                                                                                                                                      | [Erwinia phage vB_EamM_ChrisDB  | 48.09%  |
| structural and packaging protein                  | pSAL_SNUABM04_151 | putative virion structural protein                                                                                                                                                                                      | [Erwinia phage vB_EamM_Asesino] | 53.87%  |
| structural and packaging protein                  | pSAL_SNUABM04_152 | putative virion structural protein [Fibronectin-III type domain (PF16794.6) containing protein; Pfam-A_v33.1]                                                                                                           | [Cronobacter phage CR5]         | 47.12%  |
|                                                   | pSAL_SNUABM04_153 | hypothetical protein [LPAM_1 domain (PF08139.13) containing protein; Pfam-A_v33.1]                                                                                                                                      | [Erwinia phage vB_EamM_Huxley]  | 92.47%  |
|                                                   | pSAL_SNUABM04_154 | hypothetical protein                                                                                                                                                                                                    | [Erwinia phage vB_EamM_Huxley]  | 85.96%  |
|                                                   | pSAL_SNUABM04_155 | hypothetical protein                                                                                                                                                                                                    | [Erwinia phage vB_EamM_Huxley]  | 91.57%  |
|                                                   | pSAL_SNUABM04_156 | hypothetical protein [DUF1353 domain (PF07087.12) containing protein]                                                                                                                                                   | [Erwinia phage vB_EamM_Huxley]  | 96.61%  |
|                                                   | pSAL_SNUABM04_157 | hypothetical protein                                                                                                                                                                                                    | [Erwinia phage vB_EamM_Huxley]  | 97.37%  |
| lysis related protein                             | pSAL_SNUABM04_158 | putative peptidoglycan domain protein [N-acetylmuramidase_GH108 domain (cd13926) containing protein; CDD_v3.18, Glyco_hydro_108 domain (PF05838.13), PG_binding_3 domain (PF09374.11) containing protein; Pfam-A_v33.1] | [Erwinia phage vB_EamM_Huxley]  | 99.50%  |
|                                                   | pSAL_SNUABM04_159 | hypothetical protein [DUF4376 domain (PF14301.7) containing protein; Pfam-A_v33.1]                                                                                                                                      | [Erwinia phage vB_EamM_Parshik] | 98.62%  |
|                                                   | pSAL_SNUABM04_160 | hypothetical protein                                                                                                                                                                                                    | [Erwinia phage vB_EamM_Huxley]  | 98.92%  |
| DNA replication and nucleotide metabolism protein | pSAL_SNUABM04_161 | putative radical SAM superfamily protein                                                                                                                                                                                | [Erwinia phage vB_EamM_Huxley]  | 99.33%  |
| DNA replication and nucleotide metabolism protein | pSAL_SNUABM04_162 | putative radical SAM superfamily protein                                                                                                                                                                                | [Erwinia phage vB_EamM_Huxley]  | 99.62%  |
|                                                   | pSAL_SNUABM04_163 | hypothetical protein                                                                                                                                                                                                    | [Erwinia phage vB_EamM_Parshik] | 96.58%  |
|                                                   | pSAL_SNUABM04_164 | hypothetical protein                                                                                                                                                                                                    | [Erwinia phage vB_EamM_Huxley]  | 100.00% |
|                                                   | pSAL_SNUABM04_165 | hypothetical protein                                                                                                                                                                                                    | [Erwinia phage vB_EamM_Parshik] | 96.40%  |
|                                                   | pSAL_SNUABM04_166 | hypothetical protein                                                                                                                                                                                                    | [Erwinia phage vB_EamM_Parshik] | 96.88%  |

|                                  |                   |                                                                                                                               |                                 |         |
|----------------------------------|-------------------|-------------------------------------------------------------------------------------------------------------------------------|---------------------------------|---------|
| structural and packaging protein | pSAL_SNUABM04_167 | hypothetical protein                                                                                                          | [Erwinia phage vB_EamM_Parshik] | 98.25%  |
|                                  | pSAL_SNUABM04_168 | hypothetical protein<br>[Uncharacterised protein family domain (UPF0242) containing protein; Pfam-A_v33.1]                    | [Erwinia phage vB_EamM_Huxley]  | 74.27%  |
|                                  | pSAL_SNUABM04_169 | hypothetical protein                                                                                                          | [Erwinia phage vB_EamM_Parshik] | 97.28%  |
|                                  | pSAL_SNUABM04_170 | putative virion structural protein                                                                                            | [Erwinia phage vB_EamM_Huxley]  | 97.03%  |
|                                  | pSAL_SNUABM04_171 | putative virion structural protein                                                                                            | [Erwinia phage Machina]         | 98.81%  |
|                                  | pSAL_SNUABM04_172 | putative virion structural protein                                                                                            | [Erwinia phage vB_EamM_Huxley]  | 100.00% |
|                                  | pSAL_SNUABM04_173 | hypothetical protein<br>[DUF1471 domain (PF07338.14) containing protein; Pfam-A_v33.1]                                        | [Chloroflexi bacterium]         | 35.29%  |
| structural and packaging protein | pSAL_SNUABM04_174 | hypothetical protein                                                                                                          | [Erwinia phage Machina]         | 98.05%  |
|                                  | pSAL_SNUABM04_175 | putative virion structural protein<br>[Bacteriophage Mu Gp45 spike protein (PF06890) domain containing protein; Pfam-A_v33.1] | [Erwinia phage vB_EamM_Huxley]  | 96.17%  |
|                                  | pSAL_SNUABM04_176 | hypothetical protein                                                                                                          | [Erwinia phage Machina]         | 86.83%  |
|                                  | pSAL_SNUABM04_177 | hypothetical protein                                                                                                          | [Erwinia phage Machina]         | 31.25%  |
|                                  | pSAL_SNUABM04_178 | hypothetical protein                                                                                                          | [Erwinia phage vB_EamM_Huxley]  | 61.19%  |
|                                  | pSAL_SNUABM04_179 | hypothetical protein                                                                                                          | [Erwinia phage vB_EamM_Parshik] | 92.66%  |
|                                  | pSAL_SNUABM04_180 | hypothetical protein                                                                                                          | [Erwinia phage vB_EamM_Huxley]  | 97.86%  |
|                                  | pSAL_SNUABM04_181 | hypothetical protein<br>[ART-PolyVal domain (PF18760) containing protein; Pfam-A_v33.1]                                       | [Erwinia phage Machina]         | 96.32%  |
|                                  | pSAL_SNUABM04_182 | hypothetical protein                                                                                                          | [Erwinia phage vB_EamM_Huxley]  | 54.30%  |
|                                  | pSAL_SNUABM04_183 | hypothetical protein                                                                                                          | [Erwinia phage vB_EamM_Huxley]  | 94.49%  |
|                                  | pSAL_SNUABM04_184 | hypothetical protein                                                                                                          | [Erwinia phage vB_EamM_Huxley]  | 99.25%  |

|                                                   |                   |                                                                                                                                               |                                |         |
|---------------------------------------------------|-------------------|-----------------------------------------------------------------------------------------------------------------------------------------------|--------------------------------|---------|
| DNA replication and nucleotide metabolism protein | pSAL_SNUABM04_185 | hypothetical protein<br>[PAGK domain (PF15284) containing protein; Pfam-A_v33.1]                                                              | [Erwinia phage vB_EamM_Huxley] | 100.00% |
|                                                   | pSAL_SNUABM04_186 | hypothetical protein                                                                                                                          | [Erwinia phage vB_EamM_Huxley] | 93.89%  |
|                                                   | pSAL_SNUABM04_187 | hypothetical protein                                                                                                                          | [Erwinia phage vB_EamM_Huxley] | 94.24%  |
|                                                   | pSAL_SNUABM04_188 | hypothetical protein                                                                                                                          | [Erwinia phage Machina]        | 98.45%  |
|                                                   | pSAL_SNUABM04_189 | putative SMC domain-containing protein<br>[putative Smc; Chromosome segregation ATPase domain (COG1196) protein; COG_KOG_v1.0]                | [Erwinia phage Machina]        | 94.74%  |
|                                                   | pSAL_SNUABM04_190 | hypothetical protein                                                                                                                          | [Erwinia phage Machina]        | 100.00% |
|                                                   | pSAL_SNUABM04_191 | hypothetical protein                                                                                                                          | [Erwinia phage vB_EamM_Huxley] | 73.85%  |
|                                                   | pSAL_SNUABM04_192 | hypothetical protein                                                                                                                          | [Erwinia phage vB_EamM_Huxley] | 95.18%  |
| DNA replication and nucleotide metabolism protein | pSAL_SNUABM04_193 | hypothetical protein                                                                                                                          | [Erwinia phage vB_EamM_Huxley] | 95.03%  |
|                                                   | pSAL_SNUABM04_194 | putative acetyltransferase<br>[Acetyltransferase (PF13420) domain protein; Pfam-A_v33.1]                                                      | [Erwinia phage vB_EamM_Huxley] | 94.55%  |
| DNA replication and nucleotide metabolism protein | pSAL_SNUABM04_195 | putative GTPase with similarity to GTPase center in EF-Tu<br>[EF-Tu_GTP-binding domain (cd01884) containing protein; CDD_v3.18, Pfam-A_v33.1] | [Erwinia phage vB_EamM_Huxley] | 98.82%  |
|                                                   | pSAL_SNUABM04_196 | hypothetical protein                                                                                                                          | [Erwinia phage vB_EamM_Huxley] | 96.15%  |
| structural and packaging protein                  | pSAL_SNUABM04_197 | hypothetical protein                                                                                                                          | [Erwinia phage vB_EamM_Huxley] | 97.73%  |
|                                                   | pSAL_SNUABM04_198 | hypothetical protein                                                                                                                          | [Erwinia phage vB_EamM_Huxley] | 98.76%  |
|                                                   | pSAL_SNUABM04_199 | putative Appr-1-p processing protein<br>[macrodomain superfamily domain (cd02749) protein; CDD_v3.18]                                         | [Erwinia phage vB_EamM_Huxley] | 100.00% |
| lysis related protein                             | pSAL_SNUABM04_200 | putative endolysin<br>[LT_MltC_MltE domain (cd16893) containing protein; CDD_v3.18]                                                           | [Erwinia phage vB_EamM_Huxley] | 98.24%  |
|                                                   | pSAL_SNUABM04_201 | hypothetical protein                                                                                                                          | [Erwinia phage vB_EamM_Huxley] | 96.30%  |

|                                                   |                   |                                                                                                                                 |                                 |         |
|---------------------------------------------------|-------------------|---------------------------------------------------------------------------------------------------------------------------------|---------------------------------|---------|
|                                                   | pSAL_SNUABM04_202 | hypothetical protein                                                                                                            | [Erwinia phage vB_EamM_Huxley]  | 86.10%  |
|                                                   | pSAL_SNUABM04_203 | hypothetical protein                                                                                                            | [Erwinia phage vB_EamM_Huxley]  | 94.88%  |
|                                                   | pSAL_SNUABM04_204 | hypothetical protein                                                                                                            | [Erwinia phage vB_EamM_Huxley]  | 98.05%  |
|                                                   | pSAL_SNUABM04_205 | hypothetical protein                                                                                                            | [Erwinia phage vB_EamM_Huxley]  | 100.00% |
| structural and packaging protein                  | pSAL_SNUABM04_206 | putative virion structural protein                                                                                              | [Erwinia phage vB_EamM_Parshik] | 99.38%  |
|                                                   | pSAL_SNUABM04_207 | hypothetical protein                                                                                                            | [Erwinia phage vB_EamM_Huxley]  | 99.35%  |
|                                                   | pSAL_SNUABM04_208 | hypothetical protein                                                                                                            | [Erwinia phage vB_EamM_Huxley]  | 99.60%  |
| DNA replication and nucleotide metabolism protein | pSAL_SNUABM04_209 | putative endodeoxyribonuclease [DUF5051 ; 3' exoribonuclease, RNase T-like domain (PF16473.6) containing protein; Pfam-A_v33.1] | [Erwinia phage vB_EamM_Huxley]  | 99.41%  |
| DNA replication and nucleotide metabolism protein | pSAL_SNUABM04_210 | putative ribonuclease H [RNase_HI_prokaryote_like domain (cd09278) containing protein; CDD_v3.18]                               | [Erwinia phage Machina]         | 99.60%  |
|                                                   | pSAL_SNUABM04_211 | hypothetical protein                                                                                                            | [Erwinia phage vB_EamM_Huxley]  | 97.95%  |
|                                                   | pSAL_SNUABM04_212 | hypothetical protein                                                                                                            | [Erwinia phage vB_EamM_Huxley]  | 99.18%  |
|                                                   | pSAL_SNUABM04_213 | hypothetical protein                                                                                                            | [Erwinia phage vB_EamM_Huxley]  | 97.55%  |
|                                                   | pSAL_SNUABM04_214 | hypothetical protein                                                                                                            | [Erwinia phage vB_EamM_Huxley]  | 97.67%  |
|                                                   | pSAL_SNUABM04_215 | hypothetical protein                                                                                                            | [Erwinia phage vB_EamM_Huxley]  | 97.77%  |
|                                                   | pSAL_SNUABM04_216 | hypothetical protein                                                                                                            | [Erwinia phage vB_EamM_Huxley]  | 81.59%  |
|                                                   | pSAL_SNUABM04_217 | hypothetical protein                                                                                                            | [Erwinia phage vB_EamM_Huxley]  | 91.82%  |
|                                                   | pSAL_SNUABM04_218 | hypothetical protein                                                                                                            | [Erwinia phage vB_EamM_Huxley]  | 99.60%  |
|                                                   | pSAL_SNUABM04_219 | hypothetical protein                                                                                                            | [Erwinia phage vB_EamM_Huxley]  | 100.00% |
|                                                   | pSAL_SNUABM04_220 | hypothetical protein                                                                                                            | [Erwinia phage vB_EamM_Huxley]  | 97.19%  |

|                                                   |                   |                                                                                                                                                                                                  |                                 |         |
|---------------------------------------------------|-------------------|--------------------------------------------------------------------------------------------------------------------------------------------------------------------------------------------------|---------------------------------|---------|
| DNA replication and nucleotide metabolism protein | pSAL_SNUABM04_221 | putative RecA recombinase [RecA domain (cd00983, PF00154.22) containing protein; CDD_v3.18, Pfam-A_v33.1]                                                                                        | [Erwinia phage vB_EamM_Huxley]  | 97.85%  |
|                                                   | pSAL_SNUABM04_222 | hypothetical protein                                                                                                                                                                             | [Erwinia phage vB_EamM_Huxley]  | 100.00% |
| DNA replication and nucleotide metabolism protein | pSAL_SNUABM04_223 | putative RNA polymerase beta subunit [RNA_pol_B_RPB2 domain (cd00653) containing protein; CDD_v3.18, RNA_pol_Rpb2 domain 6 (PF00562.29), domain 7 (PF04560.21) containing protein; Pfam-A_v33.1] | [Erwinia phage vB_EamM_Huxley]  | 99.17%  |
| structural and packaging protein                  | pSAL_SNUABM04_224 | putative virion structural protein                                                                                                                                                               | [Erwinia phage vB_EamM_Huxley]  | 97.40%  |
|                                                   | pSAL_SNUABM04_225 | hypothetical protein                                                                                                                                                                             | [Erwinia phage vB_EamM_Huxley]  | 99.44%  |
|                                                   | pSAL_SNUABM04_226 | hypothetical protein                                                                                                                                                                             | [Erwinia phage vB_EamM_Huxley]  | 100.00% |
|                                                   | pSAL_SNUABM04_227 | hypothetical protein                                                                                                                                                                             | [Erwinia phage vB_EamM_Huxley]  | 99.32%  |
|                                                   | pSAL_SNUABM04_228 | hypothetical protein                                                                                                                                                                             | [Erwinia phage vB_EamM_Huxley]  | 99.71%  |
|                                                   | pSAL_SNUABM04_229 | hypothetical protein                                                                                                                                                                             | [Erwinia phage vB_EamM_Huxley]  | 100.00% |
|                                                   | pSAL_SNUABM04_230 | hypothetical protein [Phage_30_3 domain (PF08010.12) containing protein; Pfam-A_v33.1]                                                                                                           | [Erwinia phage Machina]         | 100.00% |
|                                                   | pSAL_SNUABM04_231 | hypothetical protein                                                                                                                                                                             | [Erwinia phage vB_EamM_Huxley]  | 96.26%  |
|                                                   | pSAL_SNUABM04_232 | hypothetical protein [NTP-PPase_SsMazG domain (cd11535) containing protein; CDD_v3.18]                                                                                                           | [Erwinia phage Machina]         | 88.39%  |
|                                                   | pSAL_SNUABM04_233 | putative thymidylate synthase [Thymidylat_synt domain (PF00303.20) protein; Pfam-A_v33.1, TS_Pyrimidine_HMase domain (cd00351) protein; CDD_v3.18,]                                              | [Erwinia phage vB_EamM_Parshik] | 90.96%  |
| DNA replication and nucleotide metabolism protein | pSAL_SNUABM04_234 | hypothetical protein                                                                                                                                                                             | [Erwinia phage vB_EamM_Huxley]  | 98.26%  |
|                                                   | pSAL_SNUABM04_235 | hypothetical protein                                                                                                                                                                             | [Erwinia phage vB_EamM_Huxley]  | 94.00%  |
|                                                   | pSAL_SNUABM04_236 | hypothetical protein                                                                                                                                                                             | [Erwinia phage vB_EamM_Huxley]  | 96.30%  |

|                                                   |                   |                                                                                                                                                                                                                                               |                                 |         |
|---------------------------------------------------|-------------------|-----------------------------------------------------------------------------------------------------------------------------------------------------------------------------------------------------------------------------------------------|---------------------------------|---------|
|                                                   | pSAL_SNUABM04_237 | hypothetical protein                                                                                                                                                                                                                          | [Erwinia phage Machina]         | 98.92%  |
| DNA replication and nucleotide metabolism protein | pSAL_SNUABM04_238 | putative mazG nucleotide pyrophosphohydrolase [Nucleoside Triphosphate Pyrophosphohydrolase MazG-like domain (cd11543) containing protein; CDD_v3.18, MazG nucleotide pyrophosphohydrolase domain (PF03819) containing protein; Pfam-A_v33.1] | [Erwinia phage Machina]         | 92.61%  |
|                                                   | pSAL_SNUABM04_239 | hypothetical protein                                                                                                                                                                                                                          | [Erwinia phage vB_EamM_Huxley]  | 97.59%  |
|                                                   | pSAL_SNUABM04_240 | hypothetical protein                                                                                                                                                                                                                          | [Erwinia phage vB_EamM_Huxley]  | 97.26%  |
|                                                   | pSAL_SNUABM04_241 | hypothetical protein                                                                                                                                                                                                                          | [Erwinia phage vB_EamM_Huxley]  | 99.45%  |
|                                                   | pSAL_SNUABM04_242 | hypothetical protein                                                                                                                                                                                                                          | [Erwinia phage vB_EamM_Parshik] | 99.07%  |
| structural and packaging protein                  | pSAL_SNUABM04_243 | Tail-associated lysozyme [Transglycosylase SLT domain (PF01464); Pfam-A_v33.1]                                                                                                                                                                | [Erwinia phage vB_EamM_Huxley]  | 99.81%  |
| DNA replication and nucleotide metabolism protein | pSAL_SNUABM04_244 | putative DNA-directed RNA polymerase beta subunit [RNAP_beta'_N domain (cd01609) protein; CDD_v3.18]                                                                                                                                          | [Erwinia phage vB_EamM_Parshik] | 99.50%  |
| DNA replication and nucleotide metabolism protein | pSAL_SNUABM04_245 | putative DNA-directed RNA polymerase beta subunit [RNA_pol_B_RPB2 domain (cd00653) containing protein; CDD_v3.18]                                                                                                                             | [Erwinia phage vB_EamM_Huxley]  | 100.00% |
|                                                   | pSAL_SNUABM04_246 | hypothetical protein                                                                                                                                                                                                                          | [Erwinia phage vB_EamM_Huxley]  | 99.18%  |
|                                                   | pSAL_SNUABM04_247 | hypothetical protein                                                                                                                                                                                                                          | [Erwinia phage vB_EamM_Huxley]  | 99.58%  |
|                                                   | pSAL_SNUABM04_248 | hypothetical protein                                                                                                                                                                                                                          | [Erwinia phage vB_EamM_Huxley]  | 100.00% |
| structural and packaging protein                  | pSAL_SNUABM04_249 | putative virion structural protein [Prohead core protein serine protease domain (PF03420.14) containing protein; Pfam-A_v33.1]                                                                                                                | [Erwinia phage vB_EamM_Parshik] | 100.00% |
|                                                   | pSAL_SNUABM04_250 | hypothetical protein                                                                                                                                                                                                                          | [Erwinia phage vB_EamM_Huxley]  | 100.00% |
|                                                   | pSAL_SNUABM04_251 | hypothetical protein                                                                                                                                                                                                                          | [Erwinia phage vB_EamM_Parshik] | 99.46%  |
|                                                   | pSAL_SNUABM04_252 | hypothetical protein [NT5C domain (PF069441.13) containing protein; Pfam-A_v33.1]                                                                                                                                                             | [Erwinia phage vB_EamM_Huxley]  | 82.54%  |

|                                  |                   |                                                                                                        |                                 |         |
|----------------------------------|-------------------|--------------------------------------------------------------------------------------------------------|---------------------------------|---------|
|                                  | pSAL_SNUABM04_253 | hypothetical protein                                                                                   | [Erwinia phage vB_EamM_Huxley]  | 98.67%  |
|                                  | pSAL_SNUABM04_254 | hypothetical protein<br>[DUF4202 domain (PF13875.7) containing protein; Pfam-A_v33.1]                  | [Erwinia phage vB_EamM_Huxley]  | 100.00% |
|                                  | pSAL_SNUABM04_255 | hypothetical protein                                                                                   | [Erwinia phage vB_EamM_Huxley]  | 94.74%  |
|                                  | pSAL_SNUABM04_256 | hypothetical protein                                                                                   | [Erwinia phage vB_EamM_Huxley]  | 96.63%  |
|                                  | pSAL_SNUABM04_257 | hypothetical protein                                                                                   | [Erwinia phage vB_EamM_Huxley]  | 100.00% |
| structural and packaging protein | pSAL_SNUABM04_258 | putative virion structural protein                                                                     | [Erwinia phage vB_EamM_Parshik] | 99.26%  |
| structural and packaging protein | pSAL_SNUABM04_259 | putative tail sheath protein                                                                           | [Erwinia phage vB_EamM_Huxley]  | 99.67%  |
|                                  | pSAL_SNUABM04_260 | hypothetical protein                                                                                   | [Erwinia phage vB_EamM_Parshik] | 98.10%  |
| structural and packaging protein | pSAL_SNUABM04_261 | putative virion structural protein                                                                     | [Erwinia phage vB_EamM_Huxley]  | 99.63%  |
| structural and packaging protein | pSAL_SNUABM04_262 | putative structural protein                                                                            | [Erwinia phage vB_EamM_Parshik] | 99.86%  |
| structural and packaging protein | pSAL_SNUABM04_263 | putative terminase large subunit<br>[Terminase_1 domain (PF03354.16) containing protein; Pfam-A_v33.1] | [Erwinia phage vB_EamM_Huxley]  | 100.00% |
|                                  | pSAL_SNUABM04_264 | hypothetical protein                                                                                   | [Erwinia phage vB_EamM_Huxley]  | 100.00% |
|                                  | pSAL_SNUABM04_265 | hypothetical protein                                                                                   | [Erwinia phage vB_EamM_Huxley]  | 98.94%  |
|                                  | pSAL_SNUABM04_266 | hypothetical protein                                                                                   | [Erwinia phage vB_EamM_Huxley]  | 100.00% |
|                                  | pSAL_SNUABM04_267 | hypothetical protein                                                                                   | [Erwinia phage vB_EamM_Huxley]  | 92.75%  |
|                                  | pSAL_SNUABM04_268 | hypothetical protein                                                                                   | [Erwinia phage vB_EamM_Parshik] | 98.28%  |
|                                  | pSAL_SNUABM04_269 | hypothetical protein                                                                                   | [Erwinia phage vB_EamM_Parshik] | 98.41%  |
|                                  | pSAL_SNUABM04_270 | hypothetical protein                                                                                   | [Erwinia phage vB_EamM_Huxley]  | 100.00% |
| tRNA                             | pSAL_SNUABM04_271 | tRNA-Trp                                                                                               |                                 |         |
| tRNA                             | pSAL_SNUABM04_272 | tRNA-Cys                                                                                               |                                 |         |
| tRNA                             | pSAL_SNUABM04_273 | tRNA-Tyr                                                                                               |                                 |         |



---

|      |                   |           |
|------|-------------------|-----------|
| tRNA | pSAL_SNUABM04_274 | tRNA-Gln  |
| tRNA | pSAL_SNUABM04_275 | tRNA-Asp  |
| tRNA | pSAL_SNUABM04_276 | tRNA-Ile  |
| tRNA | pSAL_SNUABM04_277 | tRNA-Glu  |
| tRNA | pSAL_SNUABM04_278 | tRNA-Ser  |
| tRNA | pSAL_SNUABM04_279 | tRNA-Ile2 |
| tRNA | pSAL_SNUABM04_280 | tRNA-Asn  |

---

<sup>1</sup> Determined by BLASTn searching.

<sup>2</sup> Determined by HHpred searching.

**Supplementary Table S2.** Calculations of average nucleotide identity (ANI) between pSal-SNUABM-04 and other neighboring jumbo-phages.

| <b>phages</b>                          | <b>OrthoANI</b> |
|----------------------------------------|-----------------|
| vB_EamM_Machina <i>Erwinia</i> phage   | 94.55           |
| vB_EamM_Parshik <i>Erwinia</i> phage   | 94.5            |
| vB_EamM_Huxley <i>Erwinia</i> phage    | 94.63           |
| vB_EamM_Caitlin <i>Erwinia</i> phage   | 70.42           |
| vB_EamM_ChrisDB <i>Erwinia</i> phage   | 69.76           |
| phiEaH2 <i>Erwinia</i> phage           | 67.72           |
| vB_EamM_Stratton <i>Erwinia</i> phage  | 68.04           |
| vB_EamM_Assessino <i>Erwinia</i> phage | 67.28           |
| SPN3US <i>Salmonella</i> phage         | 66.87           |
| SEGD1 <i>Salmonella</i> phage          | 66.85           |
| SPAsTU <i>Salmonella</i> phage         | 67.52           |
| Wellington <i>Erwinia</i> phage        | 65.56           |
| CR5 <i>Cronobacter</i> phage           | 64.13           |

<sup>1</sup> Tables may have a footer.

**Supplementary Figure S1.** Whole genome comparison of phages in *Machinavirus* cluster

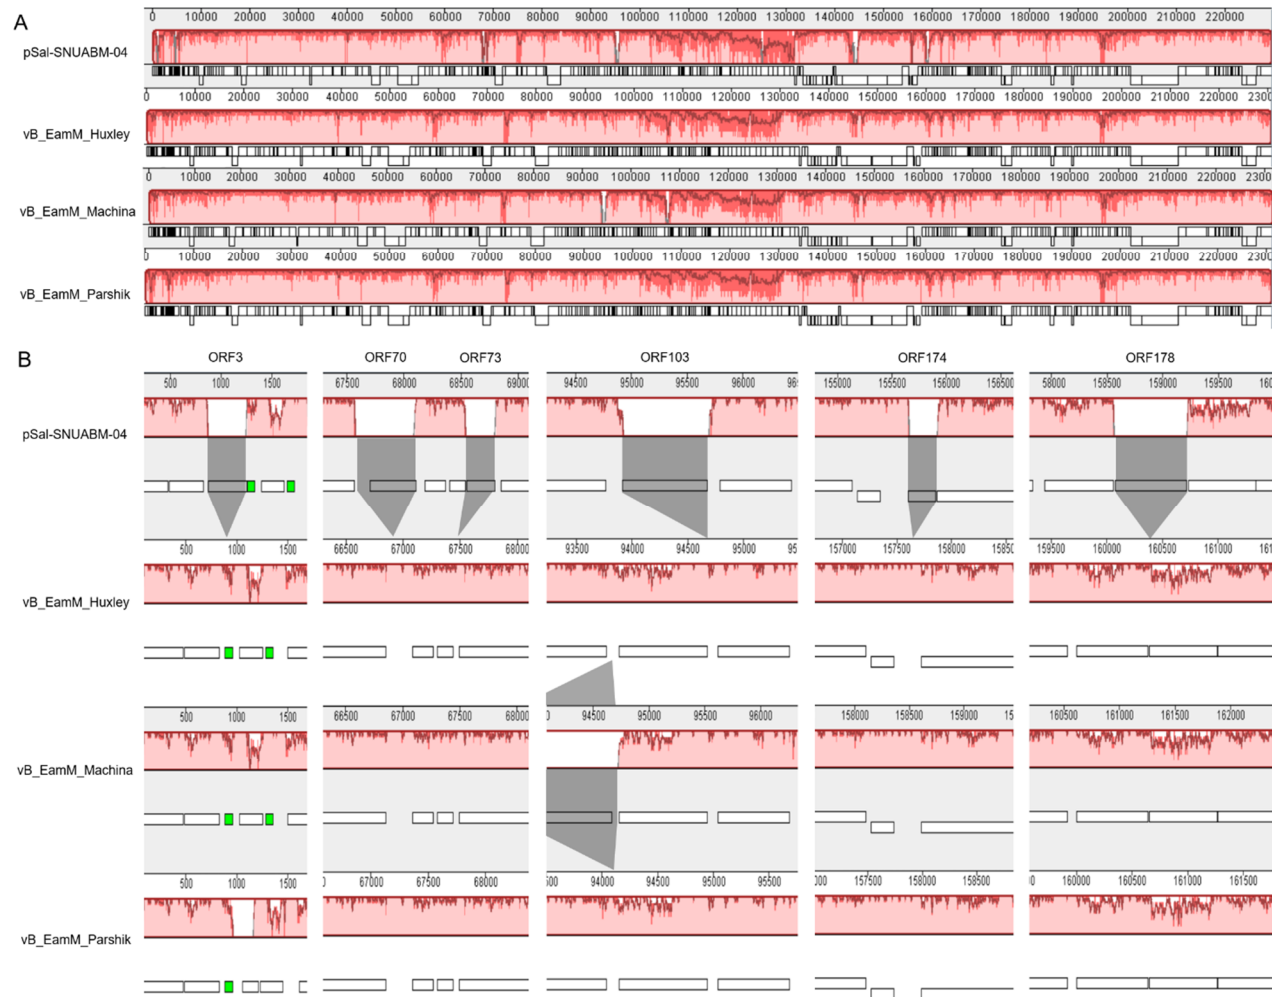

(A) Whole genome comparison of pSal-SNUABM-04, and *Machinavirus* phages. (B) Magnifications comparing the similarity of ORFs between pSal-SNUABM-04, and *Machinavirus* phages. The ORFs showed very low similarity to *Machinavirus* phages.
